# Supplementary material
Source: MDPI journal article supplement (https://www.mdpi.com/2311-7524/10/2/171)
Supplement: s1 [file s1]

**Table S1. The primer sequences required for qRT-PCR.**

| Primer name | Sequence (5'-3')         |
|-------------|--------------------------|
| TIP41-F     | CGAAGCCAGAAACGGAGAAGAAT  |
| TIP41-R     | GGGTAGGGTGGATTGGGAAGA    |
| IAA15-F     | ATCCCGTGAATGGAACGGAG     |
| IAA15-R     | CGGAGCTATATTGACGGCCT     |
| IAA30-F     | GGTGATTGGATGCTTGTGG      |
| IAA30-R     | CATAGCTTTCGGTGCGATTC     |
| LAX2-F      | GTTGTATGGGTTATCGTAGTAGGC |
| LAX2-R      | AGCACTTGCGAAGAGGC        |
| GH3.5-F     | GGACTTCTCCACCTACCC       |
| GH3.5-R     | TCCGATGGCTTTACTCTT       |
| ARR12-F     | GACTTTGCCGATGACTGTGG     |
| ARR12-R     | CGTTGTCCGTCGTGATTGTT     |
| GA2OX1-F    | GGGAGATTCAGGAGTGTCAG     |
| GA2OX1-R    | GGCGAGCTTCAGTTTATGAG     |
| TIFY10B-F   | AAGCCCCAACATACTGTCCG     |
| TIFY10B-R   | ACAAGCAGTTTCCCGTCGTA     |
| SUS1-F      | TCCCTCGAATCCTCATTGTG     |
| SUS1-R      | ACATCCTCGGCATAAGTCTC     |
| LRP1-F      | AACGCCGACCACCCTATC       |
| LRP1-R      | GCATCAAGCATCGCCACT       |
| SPL15-F     | AATACACCCCTTGCCGTCTG     |
| SPL15-R     | AGGTCGAGTTGTCGCAAGAG     |
| HOX32-F     | GCAGGTTGCTATCTGGTTT      |
| HOX32-R     | GTCAGCCCTCAGGACACT       |
| AP2-F       | CAAGTGAAAGGTAGCGAGTT     |
| AP2-R       | GATCATTGAATGGGTGGC       |
